# Supplementary material for: A Systematic Review and Meta-Analysis Exploring Variations in Copper Levels between Individuals with Malaria and Uninfected Controls
Source: MDPI journal article supplement (doi:10.3390/nu15224749), 2023-11-10
Supplement: s1 [file s1]

**Table S1.** Search terms.**General keywords**

copper AND (malaria OR plasmodium OR “Plasmodium Infection“ OR “Remittent Fever“ OR “Marsh Fever“ OR Paludism)

PubMed 21 June 2023

| No. | Key concept | Search terms                                                                                                                                                                                                                                                                                                                                                            | Results |
|-----|-------------|-------------------------------------------------------------------------------------------------------------------------------------------------------------------------------------------------------------------------------------------------------------------------------------------------------------------------------------------------------------------------|---------|
| 1.  | Copper      | copper[Text Word] OR copper[MeSH Terms]                                                                                                                                                                                                                                                                                                                                 | 156,137 |
| 2.  | Malaria     | malaria[Text Word] OR plasmodium[Text Word] OR “Infections, Plasmodium“[MeSH Terms] OR “Infection, Plasmodium“[MeSH Terms] OR “Plasmodium Infection“[MeSH Terms] OR “Remittent Fever“[MeSH Terms] OR “Fever, Remittent“[MeSH Terms] OR “Marsh Fever“[MeSH Terms] OR “Fever, Marsh“[MeSH Terms] OR Paludism [MeSH Terms]                                                 | 118,242 |
| 3.  | 1 AND 2     | (copper[Text Word] OR copper[MeSH Terms]) AND (malaria[Text Word] OR plasmodium[Text Word] OR “Infections, Plasmodium“[MeSH Terms] OR “Infection, Plasmodium“[MeSH Terms] OR “Plasmodium Infection“[MeSH Terms] OR “Remittent Fever“[MeSH Terms] OR “Fever, Remittent“[MeSH Terms] OR “Marsh Fever“[MeSH Terms] OR “Fever, Marsh“[MeSH Terms] OR Paludism [MeSH Terms]) | 152     |

Embase 21 June 2023

| No. | Key concept | Search terms                                                                                                                                                                                | Results |
|-----|-------------|---------------------------------------------------------------------------------------------------------------------------------------------------------------------------------------------|---------|
| 1.  | Copper      | copper:ti,ab,kw,de OR copper/exp                                                                                                                                                            | 245,110 |
| 2.  | Malaria     | malaria:ti,ab,kw,de OR plasmodium:ti,ab,kw,de OR ‘Remittent Fever’:ti,ab,kw,de OR ‘Marsh Fever’:ti,ab,kw,de OR Paludism:ti,ab,kw,de OR malaria/exp                                          | 156,345 |
| 3.  | 1 AND 2     | (copper:ti,ab,kw,de OR copper/exp) AND (malaria:ti,ab,kw,de OR plasmodium:ti,ab,kw,de OR ‘Remittent Fever’:ti,ab,kw,de OR ‘Marsh Fever’:ti,ab,kw,de OR Paludism:ti,ab,kw,de OR malaria/exp) | 356     |

Scopus 21 June 2023

| No. | Key concept | Search terms | Results |
|-----|-------------|--------------|---------|
|-----|-------------|--------------|---------|

|    |         |                                                                                                                                                          |         |
|----|---------|----------------------------------------------------------------------------------------------------------------------------------------------------------|---------|
| 1. | Copper  | TITLE-ABS-KEY ( copper )                                                                                                                                 | 849,374 |
| 2. | Malaria | TITLE-ABS-KEY ( ( malaria OR plasmodium OR "plasmodium infection" OR "remittent fever" OR "marsh fever" OR paludism ) )                                  | 157,025 |
| 3. | 1 AND 2 | TITLE-ABS-KEY ( copper ) AND ( TITLE-ABS-KEY ( ( malaria OR plasmodium OR "Plasmodium Infection" OR "Remittent Fever" OR "Marsh Fever" OR paludism ) ) ) | 364     |

MEDLINE 21 June 2023

| No. | Key concept        | Search terms                                                                                                   | Results |
|-----|--------------------|----------------------------------------------------------------------------------------------------------------|---------|
| 1.  | Copper AND Malaria | copper AND (malaria OR plasmodium OR "Plasmodium Infection" OR "Remittent Fever" OR "Marsh Fever" OR Paludism) | 161     |

Ovid 21 June 2023

| No. | Key concept        | Search terms                                                                                                                                                                                                                          | Results |
|-----|--------------------|---------------------------------------------------------------------------------------------------------------------------------------------------------------------------------------------------------------------------------------|---------|
| 1.  | Copper AND Malaria | copper AND (malaria OR plasmodium OR "Plasmodium Infection" OR "Remittent Fever" OR "Marsh Fever" OR Paludism) {Including Limited Related Terms}limit to (ovid full text available and articles with abstracts and original articles) | 227     |
