# Supplementary material for: A Systematic Review and Meta-Analysis Exploring Variations in Copper Levels between Individuals with Malaria and Uninfected Controls
Source: MDPI journal article supplement (doi:10.3390/nu15224749), 2023-11-10
Supplement: s1 [file s1]

**Table S4. Meta-regression results**

| Meta-analysis of<br>copper                      | Covariates                          | <i>P</i><br>value | tau2  | I <sup>2</sup> (%) | R-<br>squared<br>(%) |    |
|-------------------------------------------------|-------------------------------------|-------------------|-------|--------------------|----------------------|----|
| <b>Malaria cases vs<br/>uninfected controls</b> | Publication years                   | 0.725             | 3.274 | 98.82              | 0                    | 16 |
|                                                 | Study design                        | 0.017             | 2.218 | 98.09              | 27.67                | 16 |
|                                                 | Country                             | 0.265             | 3.303 | 98.83              | 0                    | 16 |
|                                                 | Continent                           | 0.041             | 3.027 | 98.56              | 1.29                 | 16 |
|                                                 | Age group                           | 0.934             | 3.914 | 98.97              | 0                    | 16 |
|                                                 | <i>Plasmodium</i> species           | 0.248             | 3.373 | 98.84              | 0                    | 16 |
|                                                 | Diagnostic method for<br>malaria    | 0.661             | 3.265 | 98.82              | 0                    | 16 |
|                                                 | Method for<br>measurement of copper | 0.587             | 3.472 | 98.71              | 0                    | 16 |
|                                                 | Blood samples                       | 0.230             | 3.272 | 98.68              | 0                    | 16 |
